# Supplementary material for: Enhancing CO2 gasification-reforming of municipal solid waste with Ni/CeO2 and Ni/ZrO2 catalysts
Source: Royal Society of Chemistry journal article supplement (doi:10.1039/d4ta00665h), 2024-01-01
Supplement: d4ta00665h1.pdf [file d4ta00665h1.pdf]

## **Enhancing CO<sub>2</sub> gasification-reforming of municipal solid waste with Ni/CeO<sub>2</sub> and Ni/ZrO<sub>2</sub> catalysts**

Shiyu Zhang<sup>a,b</sup>, Yibing Peng<sup>a,b</sup>, Mengna Wu<sup>a,b</sup>, Qinghai Li<sup>a,b</sup>, Yanguo Zhang<sup>a,b,\*</sup>, Hui Zhou<sup>a,b,\*</sup>

*<sup>a</sup>Key Laboratory for Thermal Science and Power Engineering of Ministry of Education, Beijing Key Laboratory of CO<sub>2</sub> Utilization and Reduction Technology, Department of Energy and Power Engineering, Tsinghua University, Beijing 100084, P.R. China*

*<sup>b</sup>Shanxi Research Institute for Clean Energy, Tsinghua University, Shanxi, Taiyuan 030000, P.R. China*

*\*Corresponding author: zhangyg@tsinghua.edu.cn (YG), huizhou@tsinghua.edu.cn (HZ)*

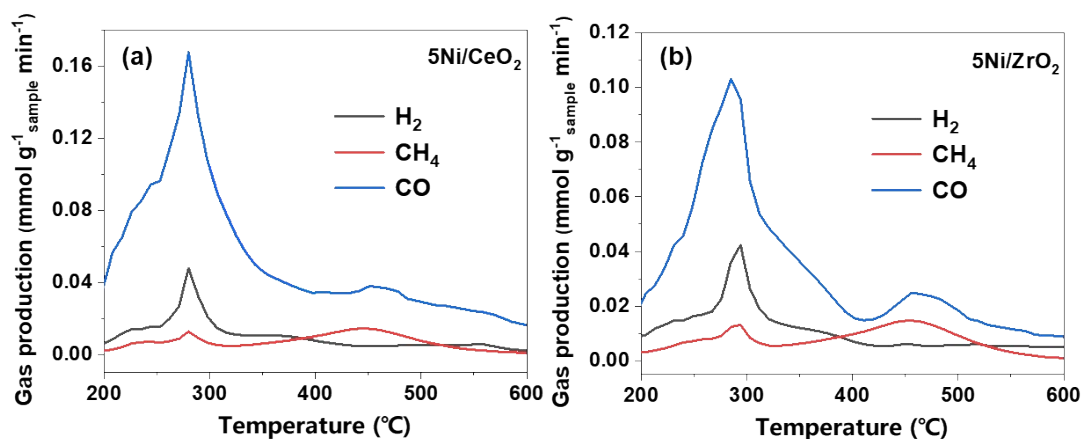

Fig. S1. The gas production rate of cabbage during CO<sub>2</sub> gasification-reforming with (a) 5%Ni/CeO<sub>2</sub> and (b) 5%Ni/ZrO<sub>2</sub> catalysts.

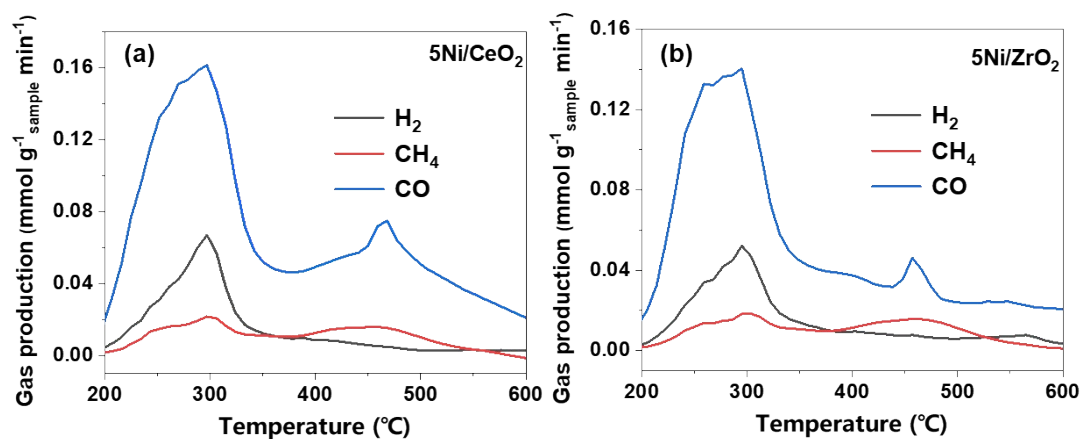

Fig. S2. The gas production rate of poplar leaves during CO<sub>2</sub> gasification-reforming with (a) 5%Ni/CeO<sub>2</sub> and (b) 5%Ni/ZrO<sub>2</sub> catalysts.

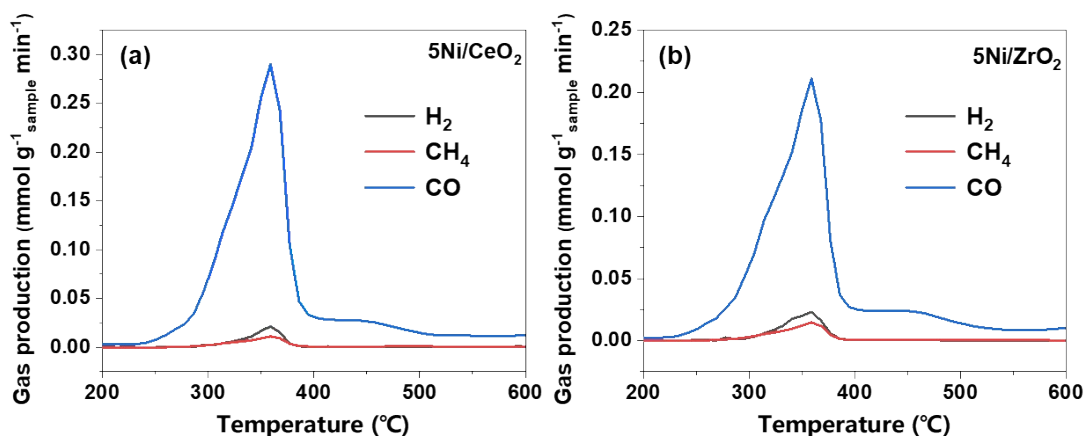

Fig. S3. The gas production rate of printed paper during CO<sub>2</sub> gasification-reforming with (a) 5%Ni/CeO<sub>2</sub> and (b) 5%Ni/ZrO<sub>2</sub> catalysts.

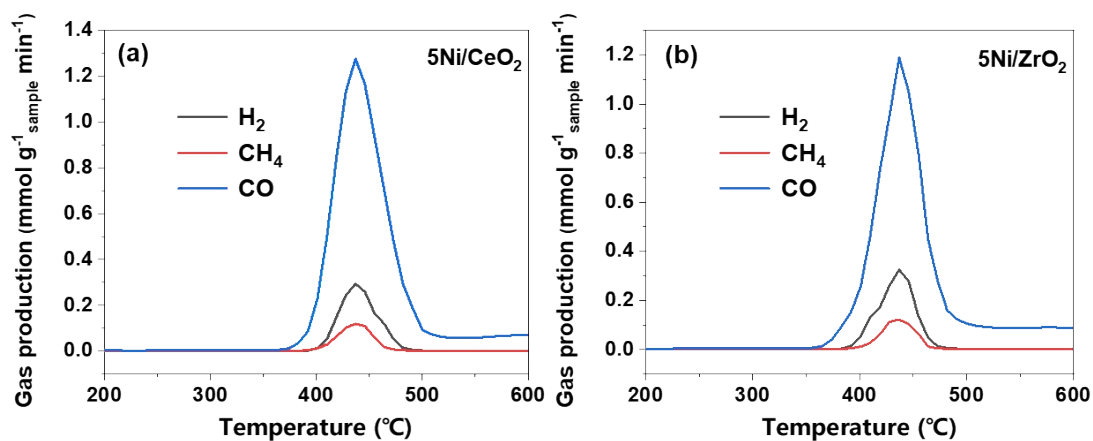

Fig. S4. The gas production rate of PET during CO<sub>2</sub> gasification-reforming with (a) 5%Ni/CeO<sub>2</sub> and (b) 5%Ni/ZrO<sub>2</sub> catalysts.

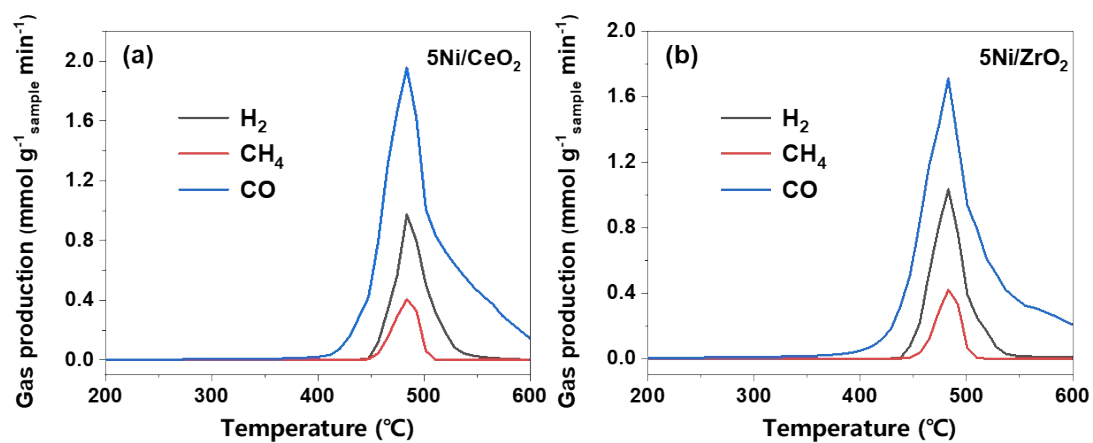

Fig. S5. The gas production rate of HDPE during CO<sub>2</sub> gasification-reforming with (a) 5%Ni/CeO<sub>2</sub> and (b) 5%Ni/ZrO<sub>2</sub> catalysts.

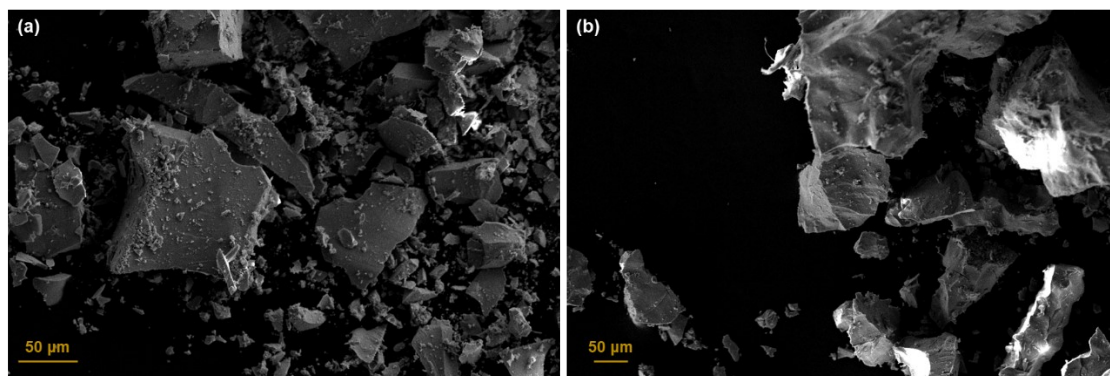

Fig. S6. SEM images of (a) CeO<sub>2</sub> and (b) ZrO<sub>2</sub> supports.

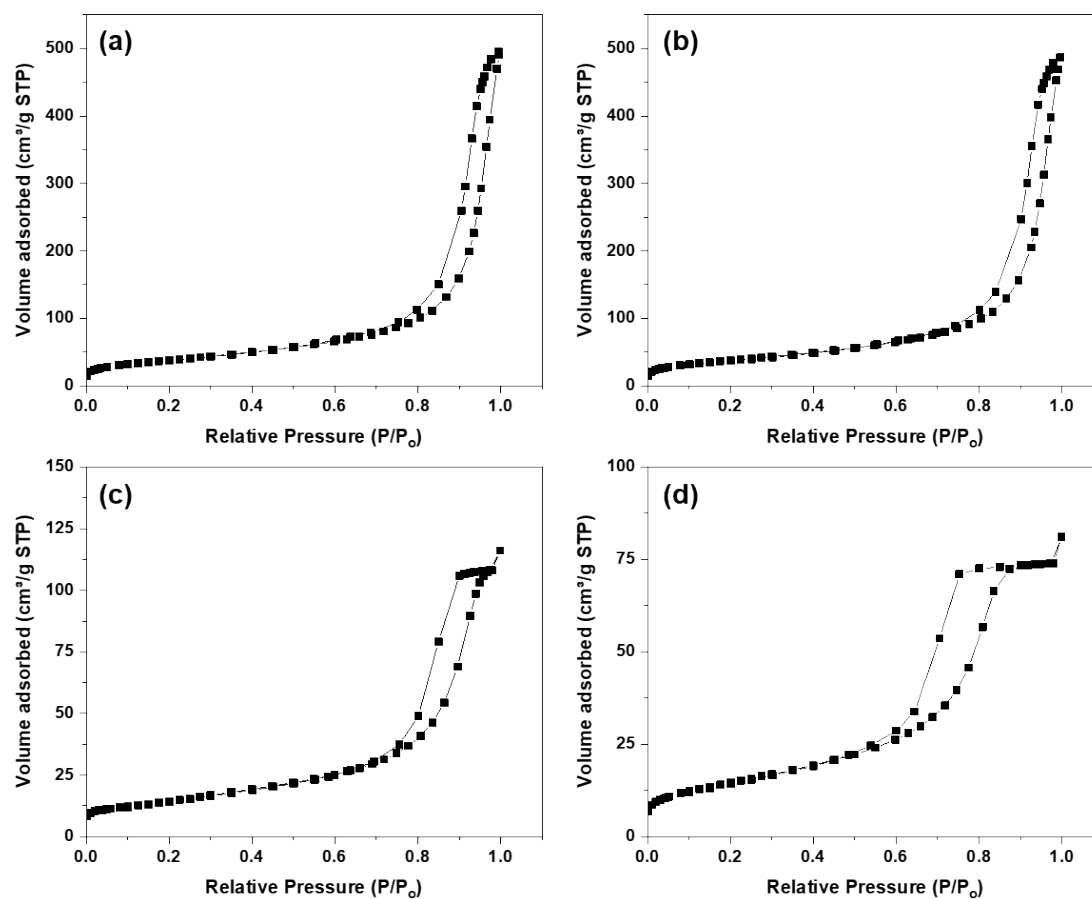

Fig. S7. N<sub>2</sub> adsorption–desorption isotherms of catalysts: (a) CeO<sub>2</sub>, (b) ZrO<sub>2</sub>, (c) 5%Ni/CeO<sub>2</sub>, and (d) 5%Ni/ZrO<sub>2</sub>.

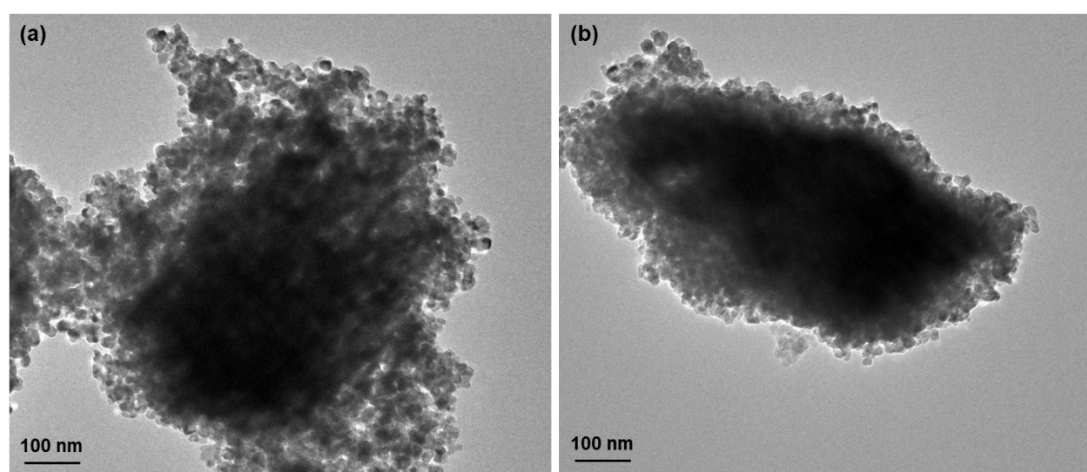

Fig. S8. HR-TEM images of (a) 5%Ni/CeO<sub>2</sub> and (b) 5%Ni/ZrO<sub>2</sub> catalysts.

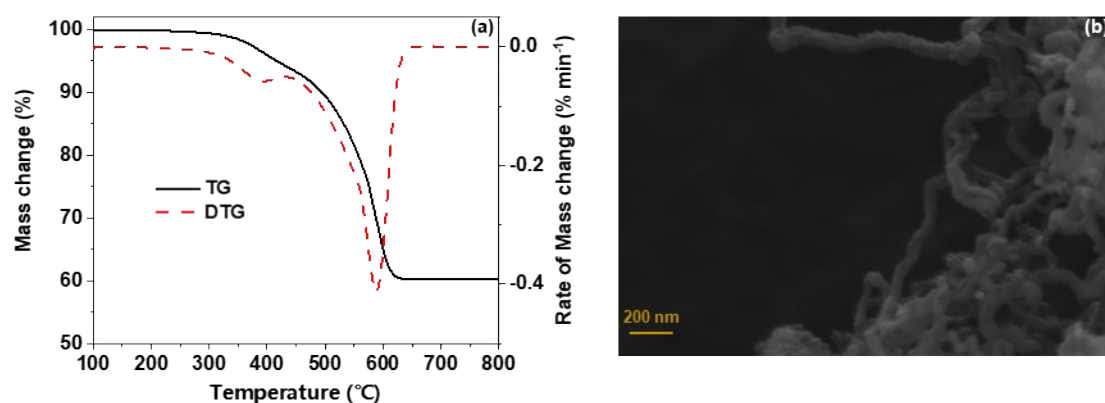

Fig. S9. Characterization of used catalyst after 5 cycles: (a) TGA experiments of the used 5%Ni/CeO<sub>2</sub> catalysts under air atmosphere at the heating rate of 10 °C min<sup>-1</sup> and (b) morphology of carbon nanotubes on used 5%Ni/CeO<sub>2</sub> catalysts.

Table S1 Proximate and ultimate analyses of the municipal solid waste components.

| Municipal solid waste | Proximate analysis (wt.%, dry basis) |       |      | Ultimate analysis (wt.%, dry ash-free basis) |      |      |      |     |
|-----------------------|--------------------------------------|-------|------|----------------------------------------------|------|------|------|-----|
|                       | A                                    | V     | FC   | C                                            | H    | O    | N    | S   |
| PET                   | 0.1                                  | 90.4  | 9.5  | 63.0                                         | 4.3  | 32.7 | 0.0  | 0.0 |
| HDPE                  | 0.0                                  | 100.0 | 0.0  | 86.0                                         | 11.2 | 2.6  | 0.2  | 0.0 |
| Cabbage               | 9.9                                  | 67.6  | 22.5 | 47.5                                         | 5.9  | 41.8 | 4.1  | 0.7 |
| Poplar leaf           | 15.7                                 | 68.7  | 15.6 | 49.6                                         | 5.2  | 43.3 | 1.3  | 0.6 |
| Printed paper         | 10.7                                 | 79.3  | 10.0 | 45.1                                         | 5.3  | 0.4  | 48.9 | 0.3 |

A: ash; V: volatile; FC: fixed carbon. The O content was calculated by difference.

Table S2 Comparison of gas yields of HDPE under N<sub>2</sub> and CO<sub>2</sub> atmospheres with and without 5%Ni/CeO<sub>2</sub> catalysts.

| Atmosphere, Catalyst                             | H <sub>2</sub> | CH <sub>4</sub> | CO   |
|--------------------------------------------------|----------------|-----------------|------|
| N <sub>2</sub> , No catalyst                     | 1.5            | 4.2             | 0.1  |
| CO <sub>2</sub> , No catalyst                    | 1.7            | 4.7             | 0.1  |
| N <sub>2</sub> , 5%Ni/CeO <sub>2</sub> catalyst  | 1.9            | 4.4             | 0.2  |
| CO <sub>2</sub> , 5%Ni/CeO <sub>2</sub> catalyst | 8.5            | 2.9             | 31.7 |

Table S3 Nominal and actual loading of Ni (determined by ICP-AES) in the Ni/CeO<sub>2</sub> catalysts.

| Catalysts              | Nominal loading (wt%) | Actual loading (wt%) |
|------------------------|-----------------------|----------------------|
| 2%Ni/CeO <sub>2</sub>  | 2                     | 1.9                  |
| 5%Ni/CeO <sub>2</sub>  | 5                     | 5.3                  |
| 10%Ni/CeO <sub>2</sub> | 10                    | 9.4                  |
